# Supplementary material
Source: PubMed Central journal article supplement (PMC4313888)
Supplement: NIHMS283642-supplement-supplement_1.pdf [file NIHMS283642-supplement-supplement_1.pdf]

## Supplementary Online Content

Thompson AM, Hu T, Eshelbrenner CL, Reynolds K, He J, Bazzano LA. Antihypertensive treatment and secondary prevention of cardiovascular disease events among persons without hypertension: a meta-analysis. *JAMA*. 2011;305(9):913-922.

**eTable 1.** Definitions of Outcomes for Each Randomized Controlled Trial Included in the Meta-analysis

**eTable 2.** Study-Specific Definitions Used to Identify Persons Without Hypertension Who Were Included in the Data Analysis

**eTable 3.** Sensitivity Analyses According to Outcome

**eTable 4.** Subgroup Analyses of Comorbid Conditions and Antihypertensive Treatment According to Outcome

This supplementary material has been provided by the authors to give readers additional information about their work.

**eTable 1.** Definitions of Outcomes for Each Randomized Controlled Trial Included in the Meta-analysis

| Trial                               | Fatal or Nonfatal Stroke | Fatal or Nonfatal MI           | Fatal or Nonfatal CHF                                                                              | Fatal or Nonfatal Composite Outcome | CVD Mortality                                                                                                        | All-cause mortality |
|-------------------------------------|--------------------------|--------------------------------|----------------------------------------------------------------------------------------------------|-------------------------------------|----------------------------------------------------------------------------------------------------------------------|---------------------|
| MIS, <sup>22</sup> 1975             |                          |                                |                                                                                                    |                                     | Cardiovascular deaths                                                                                                |                     |
| MPI, <sup>23</sup> 1980             |                          |                                |                                                                                                    |                                     |                                                                                                                      | Total mortality     |
| BHAT, <sup>24</sup> 1982            |                          |                                |                                                                                                    |                                     |                                                                                                                      | Total mortality     |
| ASPS, <sup>25</sup> 1983            |                          |                                |                                                                                                    |                                     |                                                                                                                      | Total mortality     |
| CONSENSUS II, <sup>26,27</sup> 1992 |                          |                                |                                                                                                    |                                     |                                                                                                                      | Total mortality     |
| SOLVD, <sup>28-31</sup> 1995        | Fatal or nonfatal stroke | Fatal or nonfatal acute MI     | Hospitalization for CHF                                                                            | MI, unstable angina, CVD mortality  |                                                                                                                      | Total mortality     |
| USCHF, <sup>32</sup> 1996           |                          |                                |                                                                                                    |                                     |                                                                                                                      | Total mortality     |
| TRACE, <sup>33,34</sup> 1997        |                          | Fatal or nonfatal recurrent MI | Hospitalization or death due to severe CHF                                                         |                                     | Cardiovascular death                                                                                                 | Total mortality     |
| AIRE, <sup>35,36</sup> 1999         |                          |                                | Severe/resistant CHF (clinical judgment, usually grade IV, and unresponsive to non-ACEI treatment) |                                     | Cardiovascular death                                                                                                 | Total mortality     |
| SMILE, <sup>37-39</sup> 1999        |                          | Fatal or nonfatal recurrent MI | Mild-to-moderate CHF (NYHA classification I-IV)                                                    | All-cause mortality or severe CHF   |                                                                                                                      | 6 week mortality    |
| MERIT-HF, <sup>40</sup> 2000        |                          |                                | Total mortality or hospitalization for worsening CHF                                               | All-cause mortality/hospitalization |                                                                                                                      |                     |
| CCS-1, <sup>41,42</sup> 2001        |                          |                                |                                                                                                    |                                     |                                                                                                                      | Total mortality     |
| HOPE, <sup>43-46</sup> 2001         |                          |                                |                                                                                                    | CVD death, MI, or stroke            |                                                                                                                      |                     |
| ABCD, <sup>14,47</sup> 2002         | Nonfatal stroke          | Nonfatal MI                    | Hospitalization for CHF                                                                            |                                     | Death due to CVD event: sudden death, progressive CHF, fatal MI, fatal arrhythmias, stroke, ruptured aortic aneurysm | Total mortality     |

**eTable 1 (Continued)**

| <b>Trial</b>                      | <b>Fatal or Nonfatal Stroke</b>    | <b>Fatal or Nonfatal MI</b>    | <b>Fatal or Nonfatal CHF</b>                                                                                                                         | <b>Fatal or Nonfatal Composite Outcome</b>                                                                                                                                                                              | <b>CVD Mortality</b> | <b>All-cause mortality</b> |
|-----------------------------------|------------------------------------|--------------------------------|------------------------------------------------------------------------------------------------------------------------------------------------------|-------------------------------------------------------------------------------------------------------------------------------------------------------------------------------------------------------------------------|----------------------|----------------------------|
| CAMELOT, <sup>12</sup> 2004       |                                    |                                |                                                                                                                                                      | Adverse CVD events: CVD death, nonfatal MI, resuscitated cardiac arrest, coronary revascularization, hospitalization for angina pectoris, hospitalization for CHF, fatal or nonfatal stroke, TIA, new diagnosis of PVD. |                      |                            |
| COPERNICUS, <sup>48,49</sup> 2004 |                                    |                                | Death or Hospitalization for CHF                                                                                                                     | All-cause mortality or CVD hospitalization                                                                                                                                                                              |                      | Total mortality            |
| DIABHYCAR, <sup>50</sup> 2004     |                                    |                                |                                                                                                                                                      | Combined incidence of CVD death (including sudden death), non-fatal acute MI, stroke, CHF requiring admission to hospital, end stage renal failure                                                                      |                      |                            |
| PEACE, <sup>51-53</sup> 2004      | Nonfatal stroke                    | Nonfatal MI                    |                                                                                                                                                      | Death from CVD causes or nonfatal MI, or coronary revascularization                                                                                                                                                     | Cardiovascular death | Total mortality            |
| SAVE, <sup>54,55</sup> 2004       | Nonfatal or fatal stroke           | Nonfatal or fatal recurrent MI | Overt CHF requiring hospitalization or persisting despite administration of diuretic agents and digitalis necessitating open label therapy with ACEI | Combined CVD events: death from CVD causes, CHF, recurrent MI, or stroke                                                                                                                                                | Cardiovascular death | Total mortality            |
| PROGRESS, <sup>56-58</sup> 2006   | Nonfatal or fatal stroke           |                                |                                                                                                                                                      |                                                                                                                                                                                                                         |                      | Total mortality            |
| ADVANCE, <sup>59,60</sup> 2007    |                                    |                                |                                                                                                                                                      | Major macrovascular events (CVD, nonfatal MI, nonfatal stroke) and major microvascular events (new or worsening nephropathy or retinopathy)                                                                             |                      |                            |
| PRoFESS, <sup>61,62</sup> 2008    | Nonfatal or fatal recurrent stroke |                                |                                                                                                                                                      | CVD death, MI, recurrent stroke, or worsening or new CHF                                                                                                                                                                |                      |                            |
| TRANSCEND, <sup>15</sup> 2008     |                                    |                                |                                                                                                                                                      | CVD death, MI, recurrent stroke, or worsening or new CHF                                                                                                                                                                |                      |                            |
| EUROPA, <sup>13,63,64</sup> 2009  |                                    |                                |                                                                                                                                                      | CVD death, nonfatal MI, cardiac arrest with successful resuscitation                                                                                                                                                    |                      |                            |
| PATS, <sup>65</sup> 2009          | Nonfatal or fatal stroke           |                                |                                                                                                                                                      |                                                                                                                                                                                                                         |                      |                            |

Abbreviations: MI, myocardial infarction; CHF, congestive heart failure; CVD, cardiovascular disease; ACEI, angiotensin-converting enzyme inhibitor; TIA, transient ischemic attack; PVD, peripheral vascular disease; CAD, Coronary artery disease; AF, atrial fibrillation.

**eTable 2.** Study-Specific Definitions Used to Identify Persons Without Hypertension Who Were Included in the Data Analysis

| <b>Trial</b>                        | <b>Definition of Participants without Hypertension</b>                                                                                                                               |
|-------------------------------------|--------------------------------------------------------------------------------------------------------------------------------------------------------------------------------------|
| MIS, <sup>22</sup> 1975             | Baseline DBP $\leq$ 78 mm Hg                                                                                                                                                         |
| MPI, <sup>23</sup> 1980             | Baseline DBP below mean (<79.7 mm Hg in placebo group, < 79.2 mm Hg in treatment group)                                                                                              |
| BHAT, <sup>24</sup> 1982            | Baseline DBP $\leq$ 76 mm Hg                                                                                                                                                         |
| ASPS, <sup>25</sup> 1983            | No history of hypertension                                                                                                                                                           |
| CONSENSUS II, <sup>26,27</sup> 1992 | No history of hypertension                                                                                                                                                           |
| SOLVD, <sup>28-31</sup> 1995        | No history of hypertension                                                                                                                                                           |
| USCHF, <sup>32</sup> 1996           | SBP below median (<115 mm Hg)                                                                                                                                                        |
| TRACE, <sup>33,34</sup> 1997        | No history of hypertension (clinical diagnosis having resulted in medical therapy)                                                                                                   |
| AIRE, <sup>35,36</sup> 1999         | No history of hypertension (clinical diagnosis for which medical therapy was still being taken); treatment with antihypertensive medications was for reason other than hypertension. |
| SMILE, <sup>37-39</sup> 1999        | No history of hypertension (clinical diagnosis having resulted in medical therapy)                                                                                                   |
| MERIT-HF, <sup>40</sup> 2000        | No history of hypertension                                                                                                                                                           |
| CCS-1, <sup>41,42</sup> 2001        | SBP<140 mm Hg before study entry                                                                                                                                                     |
| HOPE, <sup>43-46</sup> 2001         | Below median baseline SBP (<138 mm Hg)                                                                                                                                               |
| ABCD, <sup>14,47</sup> 2002         | Baseline DBP 80-89 mm Hg and not receiving antihypertensive medications <sup>a</sup>                                                                                                 |
| CAMELOT, <sup>12</sup> 2004         | Mean sitting SBP at baseline $\leq$ mean (129.5 and 128.9 mm Hg in treatment and placebo groups)                                                                                     |
| COPERNICUS, <sup>48,49</sup> 2004   | SBP $\leq$ 125 mm Hg <sup>b</sup>                                                                                                                                                    |
| DIABHYCAR, <sup>50</sup> 2004       | Baseline BP $\leq$ 140/90 mm Hg and not taking antihypertensive drugs.                                                                                                               |
| PEACE, <sup>51-53</sup> 2004        | Baseline BP < 140/90 mm Hg                                                                                                                                                           |
| SAVE, <sup>54,55</sup> 2004         | No history of hypertension (clinical diagnosis having resulted in medical therapy or SBP $\geq$ 140 mm Hg or DBP $\geq$ 90 mm Hg)                                                    |
| PROGRESS, <sup>56-58</sup> 2006     | Baseline SBP<140 mm Hg                                                                                                                                                               |
| ADVANCE, <sup>59,60</sup> 2007      | No history of hypertension (defined as treatment with antihypertensive medications, SBP > 140 mm Hg, DBP > 90 mm Hg at study entry)                                                  |
| PRoFESS, <sup>61,62</sup> 2008      | Baseline SBP $\leq$ 135 mm Hg                                                                                                                                                        |
| TRANSCEND, <sup>15</sup> 2008       | Baseline SBP $\leq$ 133 mm Hg <sup>c</sup>                                                                                                                                           |
| EUROPA, <sup>13 63,64</sup> 2009    | Baseline SBP <140 mm Hg <sup>d</sup>                                                                                                                                                 |
| PATS, <sup>65</sup> 2009            | Baseline BP < 140/90 mmHg                                                                                                                                                            |

SBP = systolic blood pressure; DBP = diastolic blood pressure; RR=risk ratio; CI = confidence interval.

<sup>a</sup>The "moderate therapy group" was given placebo and considered as the placebo group for the purpose of this meta-analysis; "intensive therapy group" received either nisoldipine or enalapril as the primary antihypertensive medication and was considered as the treatment group. A total of 26 subjects with DBP 80-89 mm Hg and SBP >160 mm Hg were enrolled in the study in the first year.

<sup>b</sup>The RR (95% CI) were calculated from pooled estimates of effect in Figure 2.<sup>48</sup>

<sup>c</sup>The RR (95% CI) was estimated from Figure 4.<sup>15</sup>

<sup>d</sup>The RR (95% CI) was calculated from pooled estimates of effect in Figure 2a.<sup>13</sup>

**eTable 3.** Sensitivity Analyses According to Outcome

| Outcome                                       | No. of Studies | Pooled RR (95% CI)       | Heterogeneity      |                |             |
|-----------------------------------------------|----------------|--------------------------|--------------------|----------------|-------------|
|                                               |                |                          | I <sup>2</sup> (%) | χ <sup>2</sup> | p-value     |
| <b>Composite outcome</b>                      |                |                          |                    |                |             |
| <b>Overall</b>                                | <b>13</b>      | <b>0.85 (0.80, 0.90)</b> | <b>35.4</b>        | <b>18.6</b>    | <b>0.10</b> |
| Baseline use of β-blockers or diuretics < 50% | 8              | 0.84 (0.77, 0.91)        | 44.8               | 12.67          | 0.08        |
| History of HTN in definition of normotensive  | 6              | 0.86 (0.79, 0.94)        | 42.3               | 8.65           | 0.12        |
| Sample size < median (n=1939)                 | 4              | 0.77 (0.67, 0.87)        | 31.3               | 4.36           | 0.225       |
| Study duration < median (25.1 months)         | 4              | 0.81 (0.72, 0.93)        | 47.6               | 5.73           | 0.13        |
| Study year ≥ median (2001)                    | 10             | 0.85 (0.79, 0.92)        | 42.3               | 15.6           | 0.08        |
| <b>All Cause Mortality</b>                    |                |                          |                    |                |             |
| <b>Overall</b>                                | <b>15</b>      | <b>0.87 (0.80, 0.95)</b> | <b>46.1</b>        | <b>25.98</b>   | <b>0.03</b> |
| Baseline use of β-blockers or diuretics < 50% | 12             | 0.88 (0.81, 0.95)        | 39.3               | 18.14          | 0.08        |
| History of HTN in definition of normotensive  | 8              | 0.89 (0.83, 0.96)        | 8.3                | 7.63           | 0.37        |
| Sample size < median (n=1939)                 | 9              | 0.82 (0.71, 0.95)        | 44.7               | 14.46          | 0.07        |
| Study duration < median (25.1 months)         | 8              | 0.86 (0.72, 1.03)        | 67.3               | 21.44          | 0.003       |
| Study year ≥ median (2001)                    | 6              | 0.88 (0.79, 0.98)        | 20.8               | 6.32           | 0.28        |

**eTable 4.** Subgroup Analyses of Comorbid Conditions and Antihypertensive Treatment According to Outcome

| Outcome               | Subgroup                                | No. of Studies    | Pooled RR (95% CI)       | Heterogeneity      |                |             |
|-----------------------|-----------------------------------------|-------------------|--------------------------|--------------------|----------------|-------------|
|                       |                                         |                   |                          | I <sup>2</sup> (%) | χ <sup>2</sup> | p-value     |
| Composite CVD Outcome | <b>Overall</b>                          | <b>13</b>         | <b>0.85 (0.80, 0.90)</b> | <b>35.4</b>        | <b>18.56</b>   | <b>0.10</b> |
|                       | Participants with History of MI or CAD: |                   |                          |                    |                |             |
|                       | All                                     | 5                 | 0.83(0.75, 0.93)         | 47.8               | 7.66           | 0.11        |
|                       | Some                                    | 6                 | 0.87 (0.81, 0.94)        | 22.1               | 6.42           | 0.27        |
|                       | None                                    | 2                 | 0.80 (0.63, 1.01)        | 75.1               | 4.01           | 0.05        |
|                       | Participants with History of CHF        |                   |                          |                    |                |             |
|                       | All                                     | 3                 | 0.78 (0.68, 0.91)        | 60.0               | 5.00           | 0.08        |
|                       | Some                                    | 0                 | --                       | --                 | --             | --          |
|                       | None                                    | 8                 | 0.86 (0.79, 0.93)        | 34.6               | 10.70          | 0.15        |
|                       | No information                          | 2                 | 0.90 (0.82, 0.99)        | 0.0                | 0.05           | 0.82        |
|                       | Participants with History of Diabetes   |                   |                          |                    |                |             |
|                       | All                                     | 2                 | 0.95 (0.84, 1.08)        | 0.0                | 0.99           | 0.32        |
|                       | Some                                    | 10                | 0.85 (0.81, 0.90)        | 18.4               | 11.03          | 0.27        |
|                       | No Information                          | 1                 | 0.70 (0.57, 0.86)        | --                 | --             | --          |
|                       | Antihypertensive Treatment              |                   |                          |                    |                |             |
| ACE Inhibitor         | 7                                       | 0.85 (0.78, 0.93) | 48.6                     | 11.66              | 0.07           |             |
| Other                 | 6                                       | 0.85 (0.79, 0.92) | 27.5                     | 6.90               | 0.23           |             |
| All-Cause Mortality   | <b>Overall</b>                          | <b>15</b>         | <b>0.87 (0.80, 0.95)</b> | <b>46.1</b>        | <b>25.98</b>   | <b>0.03</b> |
|                       | Participants with History of MI or CAD: |                   |                          |                    |                |             |
|                       | All                                     | 9                 | 0.89 (0.81, 0.99)        | 38.2               | 12.94          | 0.11        |
|                       | Some                                    | 4                 | 0.87 (0.71, 1.06)        | 66.2               | 8.87           | 0.03        |
|                       | None                                    | 2                 | 0.70 (0.52, 0.95)        | 8.3                | 1.09           | 0.30        |
|                       | Participants with History of CHF:       |                   |                          |                    |                |             |
|                       | All                                     | 4                 | 0.72 (0.60, 0.91)        | 68.8               | 9.60           | 0.02        |
|                       | Some                                    | 6                 | 0.93 (0.80, 1.08)        | 49.2               | 9.85           | 0.08        |
|                       | None                                    | 3                 | 0.87 (0.77, 0.98)        | 0.0                | 0.47           | 0.79        |
|                       | No information                          | 2                 | 1.08 (0.84, 1.36)        | 0.0                | 0.0            | 0.95        |
|                       | Participants with a History of Diabetes |                   |                          |                    |                |             |
|                       | All                                     | 1                 | 0.92 (0.50, 1.70)        | --                 | --             | --          |
|                       | Some                                    | 12                | 0.90 (0.84, 0.96)        | 25.6               | 14.78          | 0.19        |
|                       | No Information                          | 2                 | 0.51 (0.28, 0.92)        | 61.0               | 2.57           | 0.11        |
|                       | Antihypertensive Treatment              |                   |                          |                    |                |             |
| ACE Inhibitor         | 8                                       | 0.89 (0.84, 0.95) | 1.0                      | 7.07               | 0.42           |             |
| Other                 | 7                                       | 0.83 (0.63, 1.09) | 66.1                     | 17.68              | 0.01           |             |
